# Supplementary material
Source: Research Square preprint supplement (doi:10.21203/rs.3.rs-9079231/v1)
Supplement: Supplementary file 1 [file e758384fe38909829073d915.docx]

**Supplementary Table 1**

|  | **No** | **Yes** |  |
| --- | --- | --- | --- |
| Tobacco smoking | 28 | 16 |  |
| Alcohol consumption | 11 | 33 |  |
| Marihuana smoking | 39 | 5 |  |
| Coffee drinking | 14 | 30 |  |
| Regular exercise | 9 | 35 |  |
|  |  |  |  |
|  | **1 /day** | **2 /day** | **>2/day** |
| Tobacco consumption (cigarettes/day) | 5 | 1 | 10 |
| Marihuana smoking (joints/day) | 5 | 0 | 0 |
| Coffee drinking (cups/day) | 18 | 9 | 3 |
| Exercise (hours/week) | 0 | 4 | 31 |
|  |  |  |  |
|  | **Daily** | **Weekends** |  |
| Alcohol consumption | 0 | 33 |  |

**Supplementary Table 2**

| **A) Total sperm** | |  | |  | |  |  | **B) Viable sperm** | | |  |
| --- | --- | --- | --- | --- | --- | --- | --- | --- | --- | --- | --- |
|  |  |  | |  | |  |  |  |  |  | |
| ***Dependent variable*** | ***Parameter*** | ***b*** | | ***95% confidence interval for b*** | | ***P-value*** |  | ***b*** | ***95% confidence interval for b*** | ***P-value*** | |
| % of sperm in subpopulation 1 | Total sperm count (x106) | 0.000 | (0.000 to 0.000) | | 0.208 | |  | -3.64x10-5 | (0.000 to 0.000) | 0.699 | |
| Sperm progressive motility (%A+B) | 0.004 | | (-0.004 to 0.012) | | 0.326 |  | 0.004 | (-0.002 to 0.009) | 0.214 | |
| Total motile sperm (%A+B+C) | -0.005 | | (-0.013 to 0.003) | | 0.228 |  | -0.003 | (-0.009 to 0.003) | 0.288 | |
| Sperm with normal morphology (%) | 0.003 | | (-0.004 to 0.009) | | 0.406 |  | 0.001 | (-0.004 to 0.006) | 0.741 | |
| Sperm progressive motility after thawing and motile sperm selection (%A+B) | -0.001 | | (-0.002 to 0.001) | | 0.523 |  | -0.001 | (-0.003 to 0.000) | 0.033 * | |
|  | Constant | 0.619 | | (0.389 to 0.850) | | <0.0001 * |  | 0.741 | (0.572 to 0.910) | <0.0001 * | |
| % of sperm in subpopulation 2 | Total sperm count (x106) | -8.13x10-5 | | (0.000 to 0.000) | | 0.470 |  | 6.61x10-5 | (0.000 to 0.000) | 0.523 | |
| Sperm progressive motility (%A+B) | -0.003 | | (-0.01 to 0.004) | | 0.390 |  | -0.003 | (-0.01 to 0.003) | 0.288 | |
| Total motile sperm (%A+B+C) | 0.004 | | (-0.004 to 0.011) | | 0.327 |  | 0.003 | (-0.004 to 0.01) | 0.361 | |
| Sperm with normal morphology (%) | -0.001 | | (-0.006 to 0.005) | | 0.830 |  | 0.000 | (-0.005 to 0.005) | 0.955 | |
|  | Sperm progressive motility after thawing and motile sperm selection (%A+B) | 0.001 | | (-0.001 to 0.002) | | 0.312 |  | 0.002 | (0.000 to 0.003) | 0.027 * | |
|  | Constant | 0.313 | | (0.112 to 0.514) | | 0.003 * |  | 0.211 | (0.026 to 0.395) | 0.027 * | |
| % of sperm in subpopulation 3 | Total sperm count (x106) | -8.16x10-5 | | (0.000 to 0.000) | | 0.042 * |  | -3.09x10-5 | (0.000 to 0.000) | 0.115 | |
| Sperm progressive motility (%A+B) | -0.001 | | (-0.003 to 0.001) | | 0.430 |  | 0.000 | (-0.001 to 0.001) | 0.670 | |
| Total motile sperm (%A+B+C) | 0.001 | | (-0.001 to 0.004) | | 0.238 |  | 0.000 | (-0.001 to 0.001) | 0.731 | |
|  | Sperm with normal morphology (%) | -0.002 | | (-0.004 to 0.000) | | 0.042 * |  | -0.001 | (-0.002 to 0.000) | 0.210 | |
|  | Sperm progressive motility after thawing and motile sperm selection (%A+B) | 0.000 | | (-0.001 to 0.000) | | 0.408 |  | 0.000 | (0.000 to 0.000) | 0.139 | |
|  | Constant | 0.068 | | (-0.002 to 0.138) | | 0.058 |  | 0.048 | (0.014 to 0.083) | 0.008 * | |

**Supplementary table 3**

| **A) Total sperm** | |  |  |  | **B) Viable sperm** | | |  |
| --- | --- | --- | --- | --- | --- | --- | --- | --- |
|  |  |  |  |  |  |  |  |  |
| ***Dependent variable*** | ***Parameter*** | ***b*** | ***95% confidence interval for b*** | **P-value** |  | ***b*** | ***95% confidence interval for b*** | ***P-value*** |
| % of sperm in subpopulation 1 | Tobacco smoking (yes/no) | -0.026 | (-0.092 to 0.04) | 0.434 |  | 0.020 | (-0.028 to 0.069) | 0.401 |
|  | Alcohol consumption (yes/no) | 0.010 | (-0.079 to 0.099) | 0.825 |  | 0.021 | (-0.044 to 0.087) | 0.511 |
|  | Marihuana smoking (yes/no) | -0.024 | (-0.128 to 0.079) | 0.640 |  | -0.033 | (-0.108 to 0.043) | 0.391 |
|  | Coffee drinking (yes/no) | -0.053 | (-0.132 to 0.026) | 0.184 |  | -0.059 | (-0.117 to -0.001) | 0.045 * |
|  | Regular exercise (yes/no) | -0.025 | (-0.110 to 0.060) | 0.552 |  | -0.010 | (-0.072 to 0.053) | 0.758 |
|  | Male age (Years) | 0.002 | (-0.003 to 0.008) | 0.396 |  | 0.001 | (-0.004 to 0.005) | 0.786 |
|  | Constant | 0.537 | (0.350 to 0.723) | 0.000 |  | 0.647 | (0.510 to 0.784) | 0.000 |
| % of sperm in subpopulation 2 | Tobacco smoking (yes/no) | 0.001 | (-0.055 to 0.057) | 0.966 |  | -0.030 | (-0.083 to 0.024) | 0.265 |
|  | Alcohol consumption (yes/no) | -0.008 | (-0.083 to 0.068) | 0.836 |  | -0.011 | (-0.082 to 0.061) | 0.768 |
|  | Marihuana smoking (yes/no) | 0.030 | (-0.058 to 0.118) | 0.491 |  | 0.038 | (-0.045 to 0.121) | 0.361 |
|  | Coffee drinking (yes/no) | 0.051 | (-0.016 to 0.118) | 0.130 |  | 0.062 | (-0.002 to 0.125) | 0.058 |
|  | Regular exercise (yes/no) | 0.019 | (-0.053 to 0.091) | 0.593 |  | 0.006 | (-0.063 to 0.074) | 0.866 |
|  | Male age (Years) | -0.002 | (-0.007 to 0.003) | 0.364 |  | 0.000 | (-0.005 to 0.005) | 0.969 |
|  | Constant | 0.421 | (0.263 to 0.579) | 0.000 |  | 0.319 | (0.169 to 0.469) | 0.000 |
| % of sperm in subpopulation 3 | Tobacco smoking (yes/no) | 0.025 | (0.002 to 0.047) | 0.032 * |  | 0.009 | (-0.001 to 0.019) | 0.070 |
|  | Alcohol consumption (yes/no) | -0.002 | (-0.032 to 0.028) | 0.872 |  | -0.011 | (-0.024 to 0.003) | 0.110 |
|  | Marihuana smoking (yes/no) | -0.006 | (-0.041 to 0.029) | 0.740 |  | -0.005 | (-0.021 to 0.010) | 0.490 |
|  | Coffee drinking (yes/no) | 0.002 | (-0.025 to 0.029) | 0.873 |  | -0.002 | (-0.014 to 0.010) | 0.717 |
|  | Regular exercise (yes/no) | 0.006 | (-0.022 to 0.035) | 0.650 |  | 0.004 | (-0.009 to 0.017) | 0.529 |
|  | Male age (Years) | 0.000 | (-0.002 to 0.002) | 0.807 |  | 0.000 | (-0.001 to 0000) | 0.265 |
|  | Constant | 0.042 | (-0.020 to 0.105) | 0.178 |  | 0.034 | (0.006 to 0.062) | 0.019 * |

**Supplementary Table 4**

|  | |  | **A) Total sperm** | |  |  | |  | | |  | | | **B) Viable sperm** | | | | | | | |  | | |  | | | |  | |  |  |  |
| --- | --- | --- | --- | --- | --- | --- | --- | --- | --- | --- | --- | --- | --- | --- | --- | --- | --- | --- | --- | --- | --- | --- | --- | --- | --- | --- | --- | --- | --- | --- | --- | --- | --- |
|  |  |  |  |  |  |  | |  | | |  | | |  | | |  | | | | |  | | |  | | | |  | |  |  |  |
|  | ***Dependent variable*** | ***Parameter*** | ***b*** | ***95% confidence interval for b*** | | | | | **P-value** | | |  | | |  | | | ***b*** | | ***95% confidence interval for b*** | | | | | | **P-value** | |
|  | Fertilization rate | Constant value | 73.722 | -61.606 | to | | 209.05 | | | 0.277 | | |  | | |  | | | 37.031 | | -107.63 | | to | 181.693 | | | 0.608 | | |
|  |  | Male age (Years) | 0.296 | -0.807 | to | | 1.399 | | | 0.590 | | |  | | |  | | | 0.14 | | -0.946 | | to | 1.227 | | | 0.796 | | |
|  |  | Female age (Years) | -0.127 | -1.99 | to | | 1.736 | | | 0.891 | | |  | | |  | | | -0.008 | | -1.798 | | to | 1.782 | | | 0.993 | | |
|  |  | % sperm with abnormal morphology | 0.008 | -1.258 | to | | 1.274 | | | 0.990 | | |  | | |  | | | 0.402 | | -0.812 | | to | 1.615 | | | 0.508 | | |
|  |  | % sperm with progressive motility | -0.03 | -0.553 | to | | 0.494 | | | 0.909 | | |  | | |  | | | -0.09 | | -0.608 | | to | 0.428 | | | 0.728 | | |
|  |  | % sperm belonging to chromatin-ROS Cluster 2 | -4.044 | -84.367 | to | | 76.278 | | | 0.919 | | |  | | |  | | | 17.935 | | -73.011 | | to | 108.882 | | | 0.692 | | |
|  |  | % sperm belonging to chromatin-ROS Cluster 3 | 33.752 | -179.22 | to | | 246.724 | | | 0.750 | | |  | | |  | | | -311.618 | | -768.405 | | to | 145.169 | | | 0.176 | | |
|  | Blastocyst rate | Constant value | 103.969 | -52.231 | to | | 260.17 | | | 0.186 | | |  | | |  | | | 206.973 | | 28.241 | | to | 385.705 | | | 0.024 * | | |
|  |  | Male age (Years) | 1.503 | 0.23 | to | | 2.777 | | | 0.022 * | | |  | | |  | | | 1.396 | | 0.053 | | to | 2.738 | | | 0.042 * | | |
|  |  | Female age (Years) | -2.476 | -4.627 | to | | -0.326 | | | 0.025 * | | |  | | |  | | | -2.103 | | -4.314 | | to | 0.108 | | | 0.062 | | |
|  |  | % sperm with abnormal morphology | -0.516 | -1.977 | to | | 0.946 | | | 0.480 | | |  | | |  | | | -0.447 | | -1.946 | | to | 1.053 | | | 0.550 | | |
|  |  | % sperm with progressive motility | 0.174 | -0.43 | to | | 0.778 | | | 0.564 | | |  | | |  | | | 0.298 | | -0.342 | | to | 0.938 | | | 0.353 | | |
|  |  | % sperm belonging to chromatin-ROS Cluster 2 | 121.281 | 28.57 | to | | 213.992 | | | 0.012 * | | |  | | |  | | | 126.637 | | 14.271 | | to | 239.003 | | | 0.028 * | | |
|  |  | % sperm belonging to chromatin-ROS Cluster 3 | 87.097 | -158.722 | to | | 332.917 | | | 0.478 | | |  | | |  | | | -324.883 | | -889.251 | | to | -239.486 | | | 0.252 | | |
|  | % Good quality blastocysts | Constant value | 140.939 | 32.425 | to | | 249.452 | | | 0.012 * | | |  | | |  | | | 200.249 | | 77.248 | | to | 323.25 | | | 0.002 * | | |
|  |  | Male age (Years) | -0.506 | -1.391 | to | | 0.378 | | | 0.254 | | |  | | |  | | | -0.585 | | -1.508 | | to | 0.339 | | | 0.208 | | |
|  |  | Female age (Years) | -0.851 | -2.344 | to | | 0.643 | | | 0.257 | | |  | | |  | | | -0.606 | | -2.127 | | to | 0.916 | | | 0.426 | | |
|  |  | % sperm with abnormal morphology | -0.384 | -1.4 | to | | 0.631 | | | 0.449 | | |  | | |  | | | -0.42 | | -1.452 | | to | 0.612 | | | 0.416 | | |
|  |  | % sperm with progressive motility | -0.031 | -0.451 | to | | 0.389 | | | 0.883 | | |  | | |  | | | 0.032 | | -0.408 | | to | 0.473 | | | 0.884 | | |
|  |  | % sperm belonging to chromatin-ROS Cluster 2 | 72.681 | 8.275 | to | | 137.088 | | | 0.028 * | | |  | | |  | | | -63.689 | | -141.018 | | to | 13.639 | | | 0.104 | | |
|  |  | % sperm belonging to chromatin-ROS Cluster 3 | 13.879 | -156.894 | to | | 184.652 | | | 0.870 | | |  | | |  | | | 165.6 | | -222.791 | | to | 553.99 | | | 0.394 | | |
|  | % Euploid embryos | Constant value | 0.743 | -1.664 | to | | 3.151 | | | 0.536 | | |  | | |  | | | 1.954 | | -0.674 | | to | 4.583 | | | 0.141 | | |
|  |  | Male age (Years) | 0.012 | -0.007 | to | | 0.032 | | | 0.212 | | |  | | |  | | | 0.011 | | -0.009 | | to | 0.031 | | | 0.277 | | |
|  |  | Female age (Years) | -0.029 | -0.062 | to | | 0.004 | | | 0.088 | | |  | | |  | | | -0.025 | | -0.058 | | to | 0.007 | | | 0.125 | | |
|  |  | % sperm with abnormal morphology | -0.002 | -0.024 | to | | 0.021 | | | 0.889 | | |  | | |  | | | -0.004 | | -0.026 | | to | 0.018 | | | 0.733 | | |
|  |  | % sperm with progressive motility | 0.004 | -0.006 | to | | 0.013 | | | 0.422 | | |  | | |  | | | 0.004 | | -0.006 | | to | 0.013 | | | 0.450 | | |
|  |  | % sperm belonging to chromatin-ROS Cluster 2 | 1.08 | -0.349 | to | | 2.509 | | | 0.135 | | |  | | |  | | | -1.18 | | -2.832 | | to | 0.472 | | | 0.157 | | |
|  |  | % sperm belonging to chromatin-ROS Cluster 3 | -1.706 | -5.495 | to | | 2.083 | | | 0.368 | | |  | | |  | | | -0.441 | | -8.74 | | to | 7.858 | | | 0.915 | | |
|  | % Embryos with numerical chromosomal alterations | Constant value | -0.02 | -2.604 | to | | 2.563 | | | 0.987 | | |  | | |  | | | 0.395 | | -2.446 | | to | 3.236 | | | 0.779 | | |
|  | Male age (Years) | -0.002 | -0.023 | to | | 0.019 | | | 0.842 | | |  | | |  | | | -0.002 | | -0.023 | | to | 0.019 | | | 0.837 | | |
|  | Female age (Years) | -0.014 | -0.049 | to | | 0.021 | | | 0.424 | | |  | | |  | | | -0.013 | | -0.048 | | to | 0.021 | | | 0.436 | | |
|  | % sperm with abnormal morphology | 0.015 | -0.010 | to | | 0.039 | | | 0.227 | | |  | | |  | | | 0.011 | | -0.013 | | to | 0.035 | | | 0.348 | | |
|  | % sperm with progressive motility | 0.002 | -0.007 | to | | 0.012 | | | 0.601 | | |  | | |  | | | 0.002 | | -0.007 | | to | 0.012 | | | 0.629 | | |
|  | % sperm belonging to chromatin-ROS Cluster 2 | 0.251 | -1.295 | to | | 1.797 | | | 0.743 | | |  | | |  | | | -0.12 | | -1.952 | | to | 1.712 | | | 0.895 | | |
|  | % sperm belonging to chromatin-ROS Cluster 3 | -1.292 | -5.068 | to | | 2.485 | | | 0.492 | | |  | | |  | | | 0.152 | | -8.176 | | to | 8.481 | | | 0.971 | | |
|  | % Embryos with structural chromosomal alterations | Constant value | 0.969 | -1.616 | to | | 3.555 | | | 0.452 | | |  | | |  | | | 0.58 | | -2.266 | | to | 3.426 | | | 0.682 | | |
|  | Male age (Years) | 0.001 | -0.02 | to | | 0.022 | | | 0.909 | | |  | | |  | | | 0.001 | | -0.02 | | to | 0.022 | | | 0.901 | | |
|  | Female age (Years) | 0.016 | -0.019 | to | | 0.051 | | | 0.366 | | |  | | |  | | | 0.015 | | -0.019 | | to | 0.05 | | | 0.376 | | |
|  | % sperm with abnormal morphology | -0.015 | -0.04 | to | | 0.009 | | | 0.207 | | |  | | |  | | | -0.012 | | -0.036 | | to | 0.012 | | | 0.308 | | |
|  | % sperm with progressive motility | -0.002 | -0.012 | to | | 0.007 | | | 0.654 | | |  | | |  | | | -0.002 | | -0.011 | | to | 0.008 | | | 0.717 | | |
|  | % sperm belonging to chromatin-ROS Cluster 2 | -0.203 | -1.75 | to | | 1.345 | | | 0.792 | | |  | | |  | | | 0.12 | | -1.716 | | to | 1.955 | | | 0.895 | | |
|  | % sperm belonging to chromatin-ROS Cluster 3 | 1.473 | -2.307 | to | | 5.253 | | | 0.434 | | |  | | |  | | | 0.68 | | -7.663 | | to | 9.022 | | | 0.870 | | |
